# Supplementary material
Source: PubMed Central journal article supplement (PMC1084186)
Supplement: embor126-s1.pdf [file embor126-s1.pdf]

## Supplementary data: Ubiquitin ligase activity of BUL1

### METHOD

**In vitro ubiquitination assay.** Reaction mixtures (30 $\mu$ l) containing 0.11 $\mu$ g of E1 (Boston Biochem), 0.6 $\mu$ g of each E2 (UbcH2, H3, H5a, H5b, H5c, H6, H7 or H10; Boston Biochem), 0.8 $\mu$ g of recombinant BUL1, and 1 $\mu$ g of ubiquitin (Sigma) in 25 mM Tris-HCl (pH8.0), 120 mM NaCl, 1mM MgCl<sub>2</sub>, 2 mM ATP, 2 mM ATP- $\gamma$ -S, and 1 mM DTT were incubated for 3 h at 30 °C. The reaction was terminated by the addition of SDS sample buffer and heating at 95 °C for 5 min. Samples were resolved by SDS/PAGE on 7.5% gel and then subjected to Western blot analysis with a rabbit anti-ubiquitin antibody (Santa Cruz).

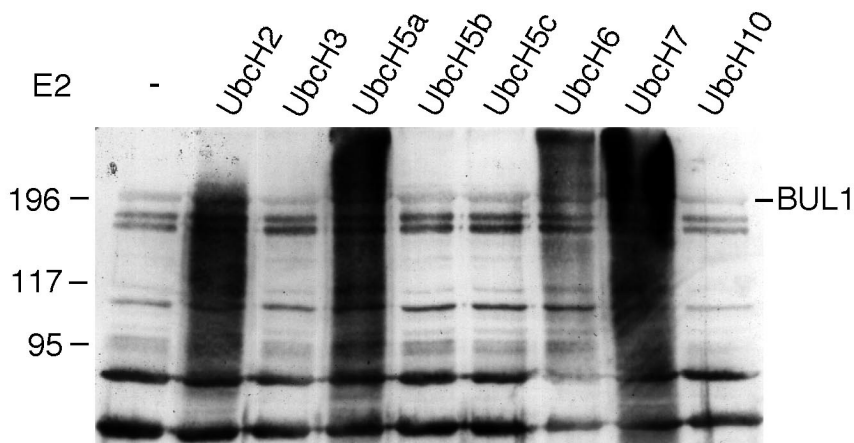

**Supplementary figure 1.** Ubiquitin ligase activity of BUL1 *in vitro*. Ubiquitin thiol ester formation of the recombinant BUL1 is observed in the presence of specific E2, UbcH2, UbcH5a, UbcH6 and UbcH7. Ubiquitination of the proteins derived from bacterial extracts is also observed in this assay.
